# Supplementary material for: Co3O4 functionalized porous carbon nanotube oxygen-cathodes to promote Li2O2 surface growth for improved cycling stability of Li–O2 batteries
Source: Royal Society of Chemistry journal article supplement (doi:10.1039/c7ta09932k), 2017-01-01
Supplement: c7ta09932k1.pdf [file c7ta09932k1.pdf]

## Support Information

# **Co<sub>3</sub>O<sub>4</sub> functionalized Porous Carbon nanotube Oxygen-Cathode to Promote Li<sub>2</sub>O<sub>2</sub> Surface Growth for Improved Cycling Stability in Li-O<sub>2</sub> Batteries**

Yin Zhou<sup>a,b,c</sup>, Zhiyang Lyu<sup>c</sup>, Liangjun Wang<sup>d</sup>, Wenhao Dong<sup>c</sup>, Wenrui Dai<sup>b,c</sup>, Xinhang Cui<sup>b,c</sup>,

Zhongkai Hao<sup>b,c</sup>, Min Lai<sup>a</sup> and Wei Chen<sup>bcd\*</sup>

<sup>a</sup>School of Physics and Optoelectronic Engineering, Nanjing University of Information Science & Technology,

Nanjing 210044, Jiangsu, China

<sup>b</sup>National University of Singapore (Suzhou) Research Institute, Suzhou, 215123, China.

<sup>c</sup>Department of Chemistry, National University of Singapore, 3 Science Drive 3, 117543, Singapore.

<sup>d</sup>Department of Physics, National University of Singapore, 2 Science Drive 3, 117542, Singapore

**\*Corresponding authors**

E-mail: [phycw@nus.edu.sg](mailto:phycw@nus.edu.sg)

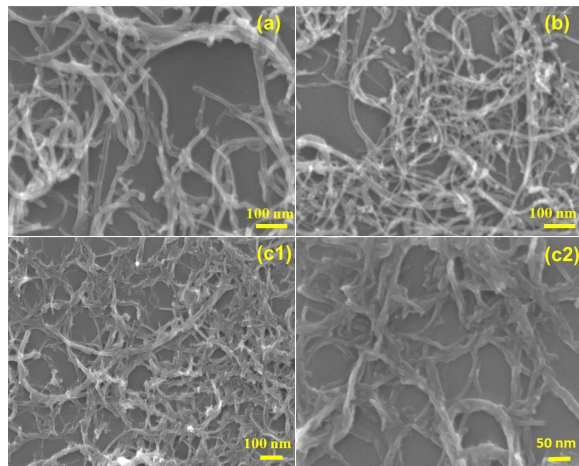

Figure S1. SEM images of (a): o-CNT; (b): p-CNT; (c1) and (c2): p-CNT/Co<sub>3</sub>O<sub>4</sub>[M].

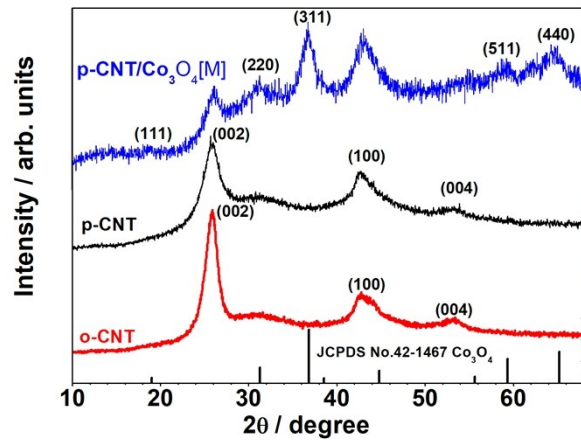

Figure S2. XRD patterns of (e): o-CNT; (f): p-CNT; (g): p-CNT/Co<sub>3</sub>O<sub>4</sub>[M].

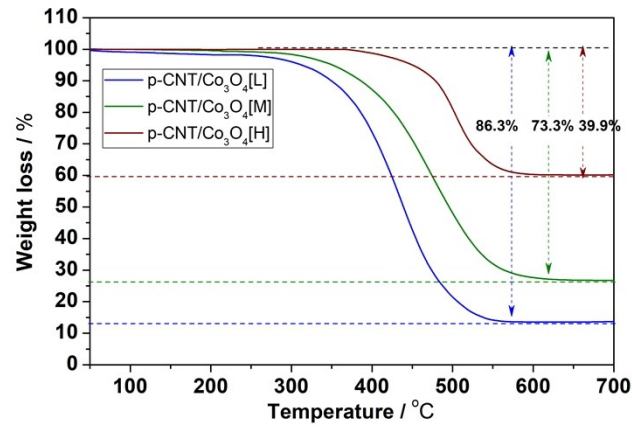

Figure S3. TG curve of p-CNT/Co<sub>3</sub>O<sub>4</sub>[L], p-CNT/Co<sub>3</sub>O<sub>4</sub>[M] and p-CNT/Co<sub>3</sub>O<sub>4</sub>[H].

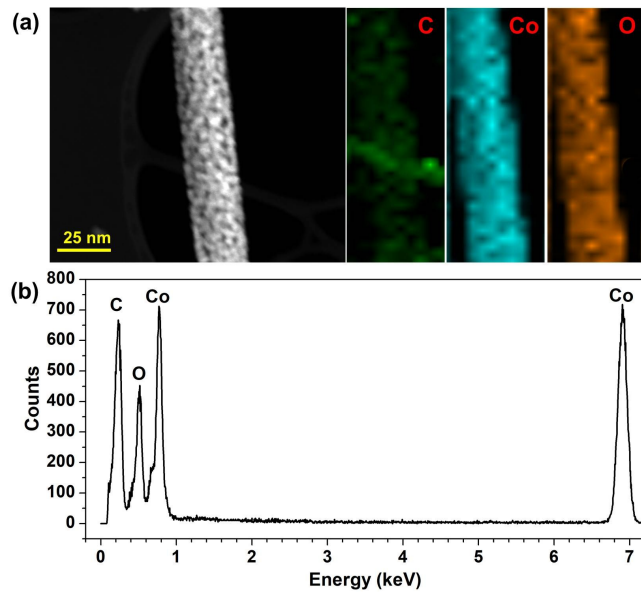

Figure S4 (a): HAADF-STEM image and EDX maps (of the C, Co, and O elements and of all three elements in the composite) of the p-CNT@Co<sub>3</sub>O<sub>4</sub>[M] sample; (b) EDX analysis of the p-CNT/Co<sub>3</sub>O<sub>4</sub>[M].

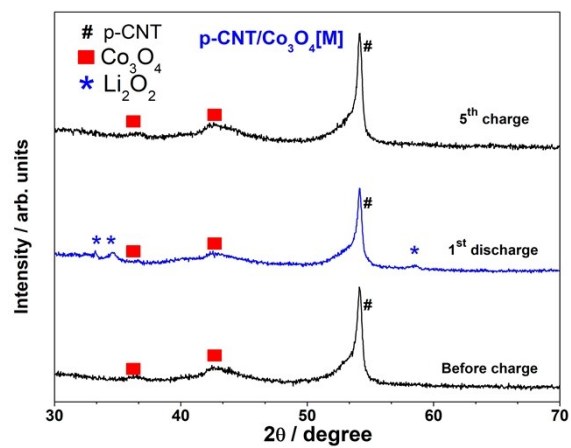

Figure S5. XRD patterns of the p-CNT/Co<sub>3</sub>O<sub>4</sub>[M] before discharge, after 1<sup>st</sup> discharge, and after 5<sup>th</sup> charge.

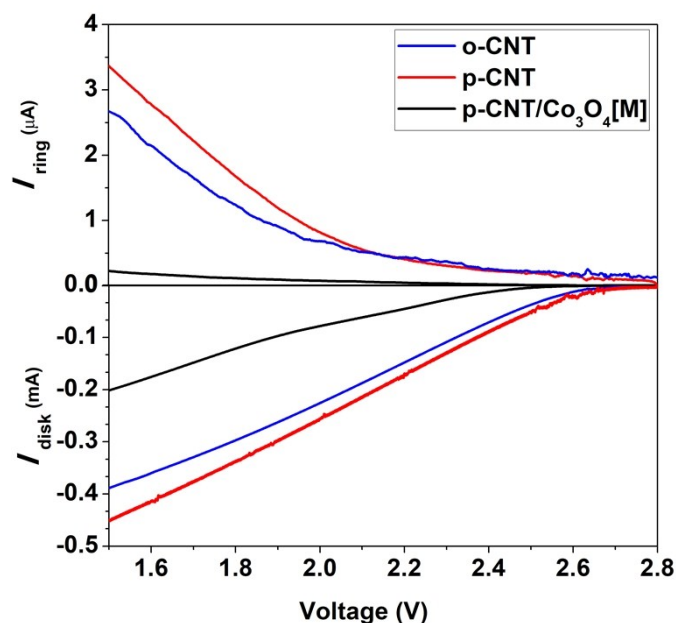

Figure S6. RRDE curves of the o-CNT, p-CNT and p-CNT/Co<sub>3</sub>O<sub>4</sub>[M] catalysts.

We do the rotating ring disk electrode (RRDE) to evaluate the role of Co<sub>3</sub>O<sub>4</sub> on the formation of Li<sub>2</sub>O<sub>2</sub>, in particularly the oxygen adsorption strength on different cathode catalysts. The RRDE of o-CNT, p-CNT and p-CNT/Co<sub>3</sub>O<sub>4</sub>[M] were tested to determine the concentration of O<sub>2</sub><sup>-</sup> adsorbed on the surface of disk or dissolved in solution. In the RRDE studies, O<sub>2</sub> is firstly reduced at the disk and then dissolved O<sub>2</sub><sup>-</sup> in electrolyte is oxidized and detected at the ring. The low ring current of p-CNT/Co<sub>3</sub>O<sub>4</sub>[M] demonstrated a very small concentration of O<sub>2</sub><sup>-</sup> in the electrolyte solution, suggesting that O<sub>2</sub><sup>-</sup> is mainly adsorbed on the p-CNT/Co<sub>3</sub>O<sub>4</sub>[M], leading to surface thin film growth mode. In contrast, the higher ring current of o-CNT and p-CNT indicated that O<sub>2</sub><sup>-</sup> is dissolved in solution, resulting in solution growth mode. The RRDE results show that the decorated Co<sub>3</sub>O<sub>4</sub> surface layer possesses stronger oxygen adsorption strength, and hence lead to the transformation of the discharge product from the toroid-type Li<sub>2</sub>O<sub>2</sub> via the solution growth mechanism to the thin film-type Li<sub>2</sub>O<sub>2</sub> via the surface growth mechanism.

Table S1. BET surface area and pore volume of o-CNT, p-CNT, p-CNT/Co<sub>3</sub>O<sub>4</sub>[L], p-CNT/Co<sub>3</sub>O<sub>4</sub>[M] and p-CNT/Co<sub>3</sub>O<sub>4</sub>[H].

| Sample                                   | S <sub>BET</sub> (m <sup>2</sup> g <sup>-1</sup> ) | S <sub>pore</sub> (cm <sup>3</sup> g <sup>-1</sup> ) |
|------------------------------------------|----------------------------------------------------|------------------------------------------------------|
| o-CNT                                    | 131.8                                              | 0.26                                                 |
| p-CNT                                    | 551.7                                              | 0.90                                                 |
| p-CNT/Co <sub>3</sub> O <sub>4</sub> [L] | 402.9                                              | 0.80                                                 |
| p-CNT/Co <sub>3</sub> O <sub>4</sub> [M] | 355.7                                              | 0.64                                                 |
| p-CNT/Co <sub>3</sub> O <sub>4</sub> [H] | 167.0                                              | 0.33                                                 |



Table S2. Fitted values for equivalent circuit elements by simulation of EIS data in Figure 7.

| Samples                                  | $R_o$ ( $\Omega$ ) |                        | $R_{ct}$ ( $\Omega$ ) |                        |
|------------------------------------------|--------------------|------------------------|-----------------------|------------------------|
|                                          | Initial            | 5 <sup>th</sup> charge | Initial               | 5 <sup>th</sup> charge |
| o-CNT                                    | 47.0               | 77.9                   | 96.2                  | 229.4                  |
| p-CNT                                    | 44.7               | 71.4                   | 55.5                  | 194.1                  |
| p-CNT/Co <sub>3</sub> O <sub>4</sub> [M] | 41.7               | 56.1                   | 74.3                  | 100.5                  |
